# Supplementary material for: Recall bias in population-based case-control studies of ovarian cancer and genital talc use: potential impact and quantitative bias analysis
Source: Research Square preprint supplement (doi:10.21203/rs.3.rs-7924814/v2), 2026-02-19
Supplement: Supplementary file 1 [file 16419cdda8e06ee5706c68a9.docx]

#load required R packages every time you open R

require("rje")

require("rjags")

require("MCMCvis")

set.seed(31415926) #fix random number seed to aid reproducibility

#A JAGS model.

#lor ~ dnorm(0,0.25) #prior on log-OR vague and null-centered approx (N(mu=0,var=4)) => 95% range 0.02 to 50

##Greenland's choice for data augmentation and control for sparse data bias

#lor ~ dnorm(0,4/3) #prior on log-OR vague and null-centered approx (N(mu=0,var=3/4)) => 95% range 0.1 to 10

#Hamra et al. 2013

genmod.string <- "model{

#data

x0 ~ dbin(p0, n0)

x1 ~ dbin(p1, n1)

#model

p0 <- r0*SN0 + (1-r0)*(1-SP0)

p1 <- r1*SN1 + (1-r1)*(1-SP1)

r1 <- (OR*r0)/(1-r0+OR*r0)

#priors

r0 ~ dbeta(aa,bb) #can make informative as per prior elucidation but flat initially as beta(1,1)

lor ~ dnorm(0, 4/3)

#misclassification among referents

SN0 ~ dbeta(a.sn0, b.sn0)

SP0 ~ dbeta(a.sp0, b.sp0)

#misclassification among cases

SN1 ~ dbeta(a.sn1, b.sn1)

SP1 ~ dbeta(a.sp1, b.sp1)

#calculations of parameters of interest

OR <- exp(lor)

}"

#in data, specify two-by-two table

#x0 and x1 are numbers of exposed referents and cases, respectively

#n0 and n1 are numbers of referents and cases, respectively

##data are from Hoppin et al as determined during 11/8/2024 workshop

# a* and b* are the shapes 1 and 2 of Beta distributions

##fixed at values elicited during prior elucidation workshop 11/8/2024

##See Appendix B for derivation of parameters of priors on misclassification parameters

## Using pooled data without the cohort study

x0=2628

x1=2057

n0=10965

n1=6997

mod <- jags.model(textConnection(genmod.string),

data=list(x0=x0, x1=x1, n0=n0, n1=n1,

a.sn0=237.019, b.sn0=66.282,

a.sp0=177.825, b.sp0=20.647,

a.sn1=159.562, b.sn1=24.693,

a.sp1=200.997, b.sp1=31.769,

aa=1, bb=1),

n.chains=4)

update(mod, 100000) #burn-in

opt.JAGS <- coda.samples(mod, n.iter=500000,

variable.names=c("SN0","SP0", "SN1", "SP1", "OR", "lor", "r0", "r1", "p1", "p0"))

#What comes out: samples from posterior distributions: true values given data, model, and priors

round(MCMCsummary(opt.JAGS),3)

MCMCtrace(opt.JAGS, params=c("OR", "lor"), pdf=F)

MCMCtrace(opt.JAGS, params=c("SN0", "SN1"), pdf=F)

MCMCtrace(opt.JAGS, params=c("SP0", "SP1"), pdf=F)

MCMCtrace(opt.JAGS, params=c("r0", "r1"), pdf=F)

MCMCtrace(opt.JAGS, params=c("p0", "p1"), pdf=F)
