# Supplementary material for: Recall bias in population-based case-control studies of ovarian cancer and genital talc use: potential impact and quantitative bias analysis
Source: Research Square preprint supplement (doi:10.21203/rs.3.rs-7924814/v2), 2026-02-19
Supplement: Supplementary file 2 [file a20796ab7238ce66d124389b.docx]

| Appendix 3. Trace plot of model parameters: of bias-adjusted, true, odds ratio , sensitivities (p) and specificities (q), as well as prevalences ( r ) of controls (subscript 0) and cases (subscript 1) | | |
| --- | --- | --- |
| 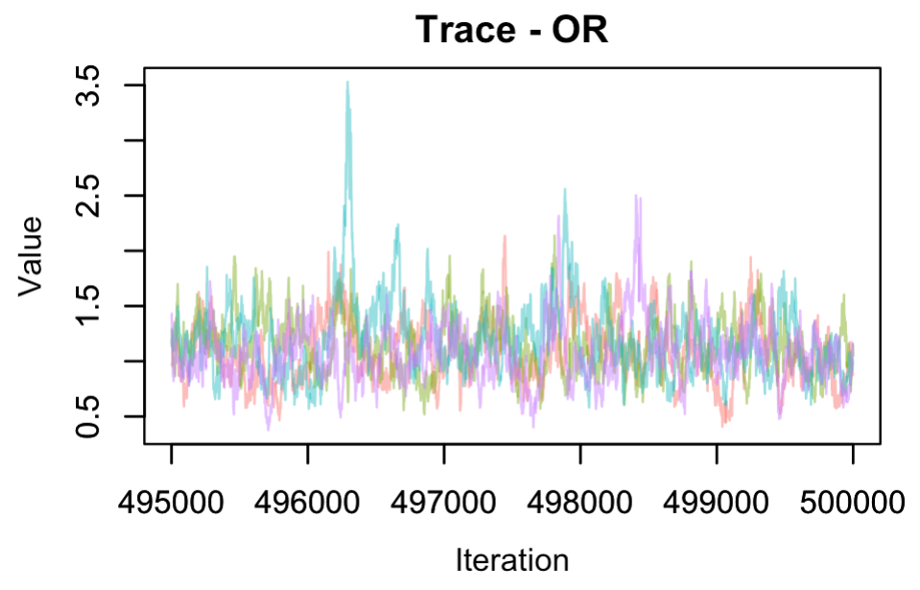 | 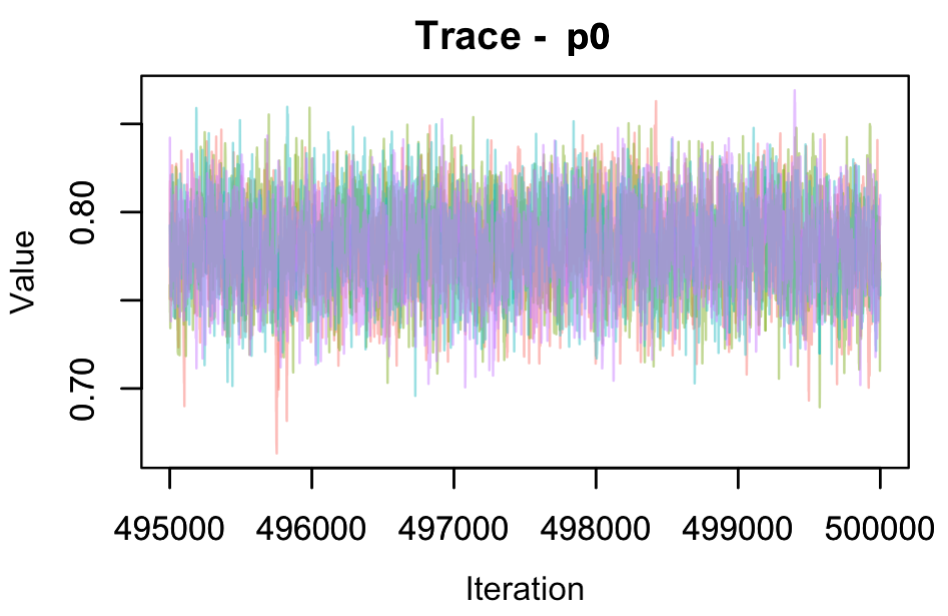 | 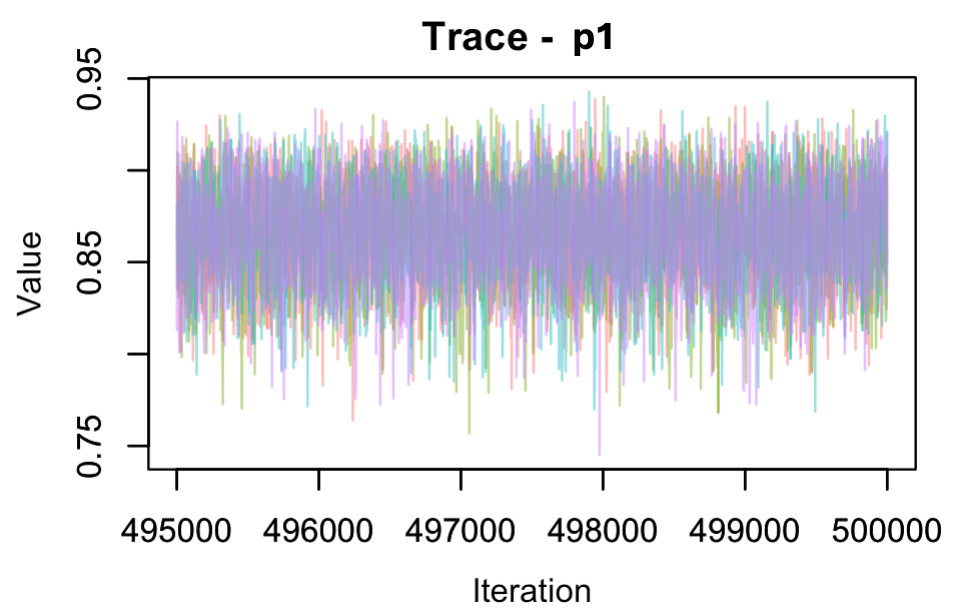 |
| 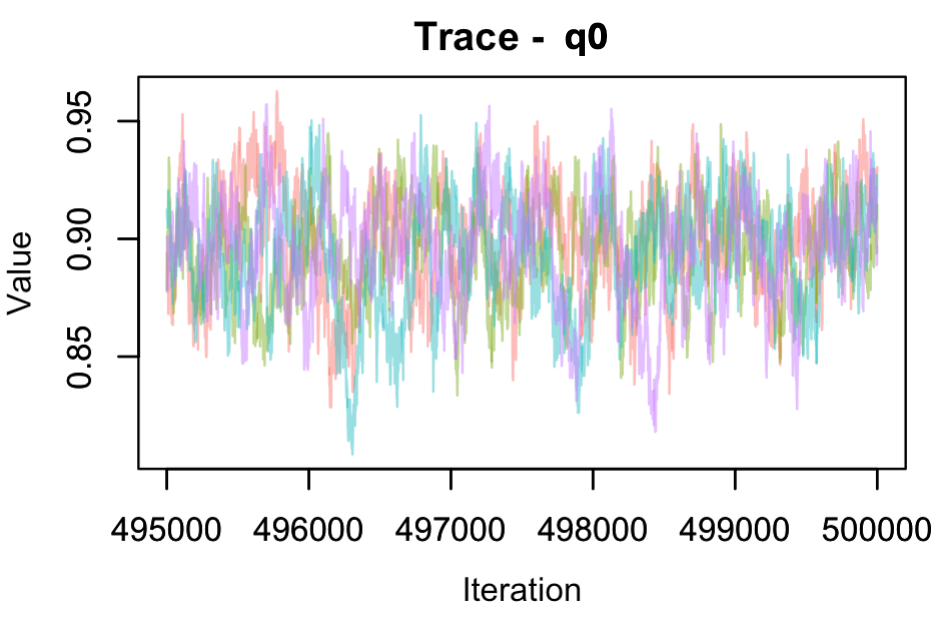 | 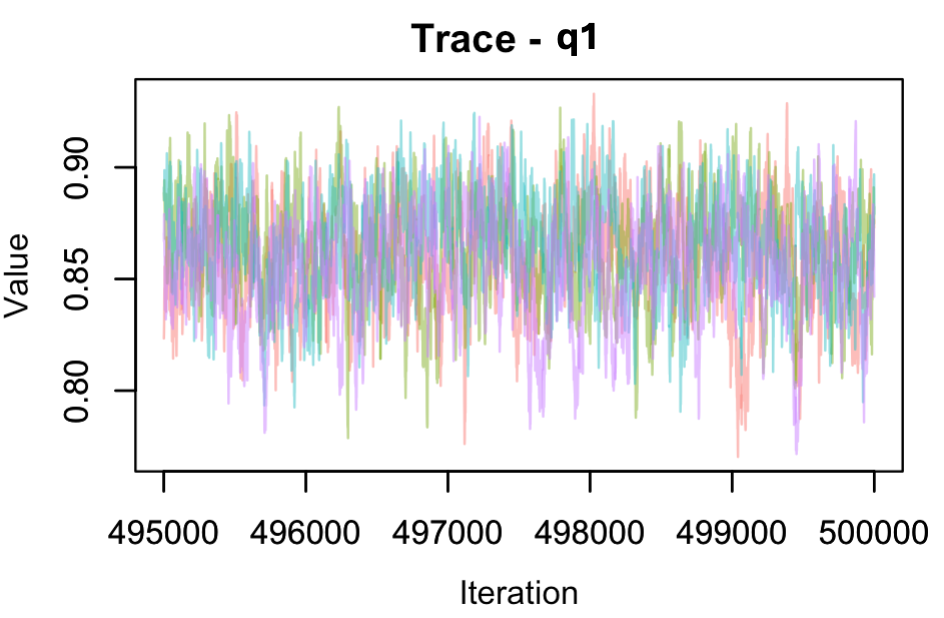 | 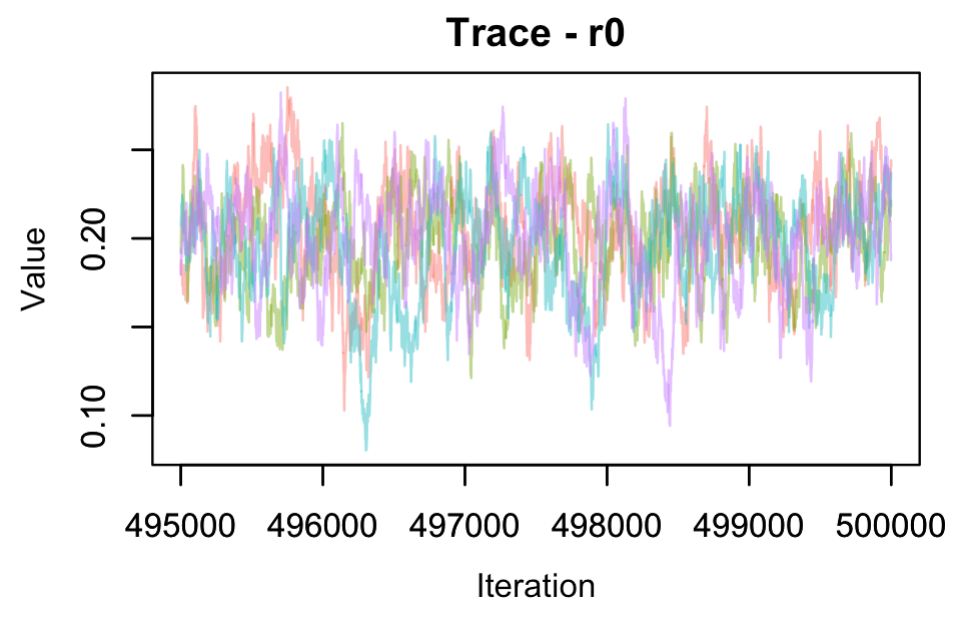 |
| 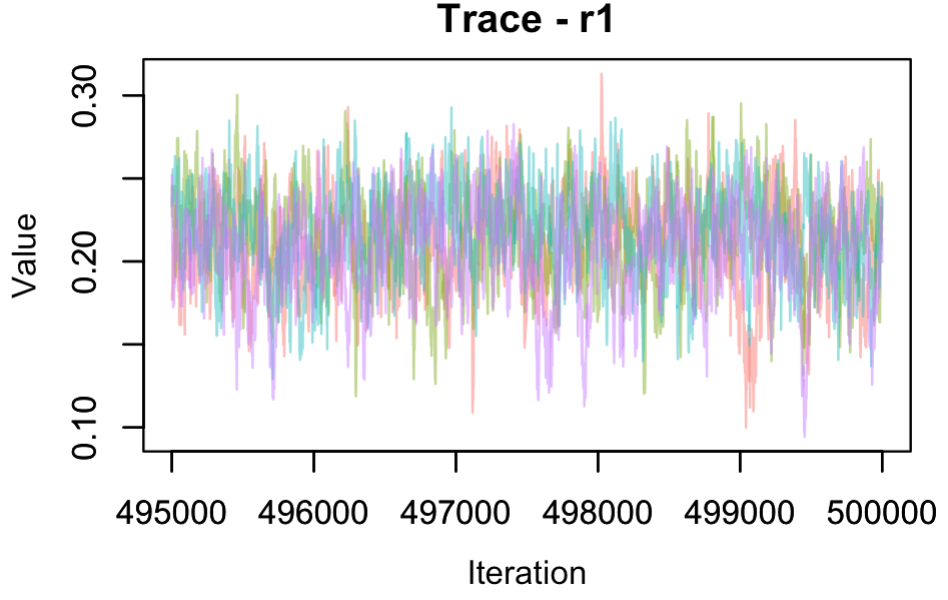 |  |  |
