# Supplementary material for: Recall bias in population-based case-control studies of ovarian cancer and genital talc use: potential impact and quantitative bias analysis
Source: Research Square preprint supplement (doi:10.21203/rs.3.rs-7924814/v2), 2026-02-19
Supplement: Supplementary file 3 [file d3c4654ad0ac73b5ec9e482a.docx]

**#Appendix 1: R(1) code for derivation of priors from expert guesses documented in the IARC monograph**

#IARC. Talc and Acrylonitrile. IARC Monogr Identif Carcinog Hazards Hum. 136:1–488. 2025. #https://publications.iarc.who.int/646.(2)

#table below refer to Annex 2 of IARC (2025)

#see main text for details

**#START OF R CODE**

#Format for each row = expert

#best 2.5%ile 97.5%ile

#from table A2.1

#expert 1

SN_case1=c(0.96, 0.94, 0.98)

SP_case1=c(0.85, 0.80, 0.90)

SN_control1=c(.9, .85, .95)

SP_control1=c(.9, .85, .95)

#expert 2

SN_case2=c(0.75, 0.65, 0.85)

SP_case2=c(0.90, 0.85, 0.95)

SN_control2=c(.65, .6, .7)

SP_control2=c(.9, .85, .95)

#expert 3

SN_case3=c(0.90, 0.85, 0.95)

SP_case3=c(0.85, 0.8, 0.9)

SN_control3=c(.8, .75, .85)

SP_control3=c(.9, .85, .95)

#combine

#average best, lowest and highest of expert guesses for sensitivity in cases

SN_case=rbind(SN_case1, SN_case2, SN_case3)

SN_case_mean=mean(SN_case[,1])

SN_case_low=mean(SN_case[,2])

SN_case_high=mean(SN_case[,3])

c(SN_case_mean, SN_case_low, SN_case_high)

#get parameters of beta distribution of SN cases

install.packages("epiR") #do only once

library("epiR")

SN1=epi.betabuster(mode=SN_case_mean, conf=0.975, imsure="greater than", x=SN_case_low, conf.level = 0.95, max.shape1 = 1000, step = 0.001)

SN1$shape1

SN1$shape2

#average best, lowest and highest of expert guesses for specificity in cases

SP_case=rbind(SP_case1, SP_case2, SP_case3)

SP_case_mean=mean(SP_case[,1])

SP_case_low=mean(SP_case[,2])

SP_case_high=mean(SP_case[,3])

c(SP_case_mean, SP_case_low, SP_case_high)

SP1=epi.betabuster(mode=SP_case_mean, conf=0.975, imsure="greater than", x=SP_case_low, conf.level = 0.95, max.shape1 = 1000, step = 0.001)

SP1$shape1

SP1$shape2

#average best, lowest and highest of expert guesses for sensitivity in controls

SN_control=rbind(SN_control1, SN_control2, SN_control3)

SN_control_mean=mean(SN_control[,1])

SN_control_low=mean(SN_control[,2])

SN_control_high=mean(SN_control[,3])

c(SN_control_mean, SN_control_low, SN_control_high)

SN0=epi.betabuster(mode=SN_control_mean, conf=0.975, imsure="greater than", x=SN_control_low, conf.level = 0.95, max.shape1 = 1000, step = 0.001)

SN0$shape1

SN0$shape2

#average best, lowest and highest of expert guesses for specificity in controls

SP_control=rbind(SP_control1, SP_control2, SP_control3)

SP_control_mean=mean(SP_control[,1])

SP_control_low=mean(SP_control[,2])

SP_control_high=mean(SP_control[,3])

c(SP_control_mean, SP_control_low, SP_control_high)

SP0=epi.betabuster(mode=SP_control_mean, conf=0.975, imsure="greater than", x=SP_control_low, conf.level = 0.95, max.shape1 = 1000, step = 0.001)

SP0$shape1

SP0$shape2

#illustrate

par(mfrow=c(1,2))

n=1000000

sim_SN1=rbeta(n, SN1$shape1, SN1$shape2)

plot(density(sim_SN1), col="red", main="SN in cases (red) and controls (blue)", ylim=c(0,20), xlim=c(0.6, 1), xlab="sensitivity (SN)")

sim_SN0=rbeta(n, SN0$shape1, SN0$shape2)

lines(density(sim_SN0), col="blue")

sim_SP1=rbeta(n, SP1$shape1, SP1$shape2)

plot(density(sim_SP1), col="red", main="SP in cases (red) and controls (blue)", ylim=c(0,20), xlim=c(0.6, 1), xlab="specificity (SP)")

sim_SP0=rbeta(n, SP0$shape1, SP0$shape2)

lines(density(sim_SP0), col="blue")

**#END OF R CODE**

Figure S: Illustration of prior densities of misclassification parameters for ever-use of talc in population-based case-control studies of ovarian cancer risk


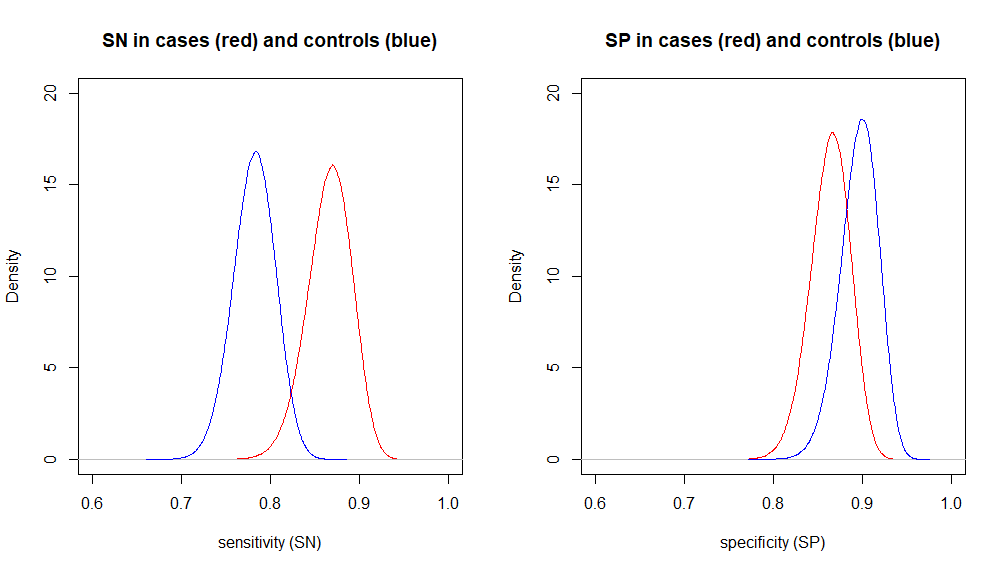


1. Team RDC. R: A language and environment for statistical computing. ISBN 3-900051-07-0. Vienna, Austria: R Foundation for Statistical Computing; 2006 2006.

2. IARC. Annex 2. Quantitative bias analysis for exposure misclassification for the effects of ever versus never use of talc on ovarian cancer. Talc and Acrylonitrile IARC Monographs on the Identification of Carcinogenic Hazards to Humans. 136. Lyon, France: IARC; 2025.
